# Supplementary material
Source: publisher figshare collection journal article supplement (https://gsapubs.figshare.com/ndownloader/files/23320163)
Supplement: Supplementary file 1 [file 23320163]

Layzell, A.L., and Mandel, R.D., 2020, Late Quaternary landscape evolution and bioclimatic change in the central Great Plains, USA: GSA Bulletin, <https://doi.org/10.1130/B35462.1>.

## **Data Repository**

**Table S1.** Description of section RR-2.

**Table S2.** Description of core A-3.

**Table S3.** Description of section RR-1.

**Table S4.** Description of core A-2.

**Table S5.** Description of core A-5.

**Table S6.** Description of core B-1.

**Table S7.** Description of core C-1.

**Table S8.** Description of core A-6.

**Table S9.** Description of core A-4.

**Table S10.** Description of core C-2.

**Table S11.** Description of core A-1.

**Table S12.** Description of section MC-1.

**Table S13.** Description of core B-2.

**Table S14.** Description of section CC-1.

Table S1. Description of section RR-2

Landform: T-0b floodplain complex.  
 GPS Location: -99.2005, 40.07048 (NAD 83)  
 Slope: 0%  
 Parent material: Alluvium  
 Elevation above river channel: 1.5 m  
 Remarks:

| Depth<br>(cm) | Soil<br>Horizon | Description                                                                                                                                                                                                 |
|---------------|-----------------|-------------------------------------------------------------------------------------------------------------------------------------------------------------------------------------------------------------|
| <b>Soil 1</b> |                 |                                                                                                                                                                                                             |
| 0-5           | A               | Brown (10YR 5/3) loamy fine sand, brown (10YR 4/3) moist; weak medium and fine granular structure; very soft, very friable; many very fine and fine and common medium roots; gradual smooth boundary.       |
| 5-15          | AC              | Brown (10YR 5/3) very fine sand, brown (10YR 4/3) moist; very weak fine granular structure; very soft, very friable; common very fine and fine and few medium roots; clear smooth boundary.                 |
| 15-51         | C1              | Pale brown (10YR 6/3) fine sand, brown (10YR 5/3) moist; single grain; loose; many very fine and fine and common medium roots; abrupt wavy boundary.                                                        |
| 51-92         | C2              | Stratified pale brown (10YR 6/3) and brown (10YR 5/3) coarse and very coarse sand interbedded with fine gravel; single grain; loose; many very fine and fine and common medium roots; abrupt wavy boundary. |
| 92-150        | C3              | Brown (10YR 5/3) coarse and very coarse sand; single grain; loose; few cobble-size clasts in the sandy matrix; few very fine and fine roots.                                                                |

Table S2. Description of core A-3.

| Landform: T-0b floodplain complex            |                 |                                                                                                                                                                                                                                                  |
|----------------------------------------------|-----------------|--------------------------------------------------------------------------------------------------------------------------------------------------------------------------------------------------------------------------------------------------|
| GPS Location: -99.421956, 40.103774 (NAD 83) |                 |                                                                                                                                                                                                                                                  |
| Slope: 0%                                    |                 |                                                                                                                                                                                                                                                  |
| Parent material: Alluvium                    |                 |                                                                                                                                                                                                                                                  |
| Elevation above river channel: 1.0 m         |                 |                                                                                                                                                                                                                                                  |
| Remarks:                                     |                 |                                                                                                                                                                                                                                                  |
| Depth<br>(cm)                                | Soil<br>Horizon | Description                                                                                                                                                                                                                                      |
| <b>Soil 1</b>                                |                 |                                                                                                                                                                                                                                                  |
| 0-5                                          | A               | Dark grayish brown (10YR 4/2) silt loam, very dark grayish brown (10YR 3/2) moist; moderate fine granular; slightly hard, friable; many fine and very fine roots; common very fine pores; clear boundary.                                        |
| 5-34                                         | AC              | Grayish brown (10YR 5/2) silt loam, dark grayish brown (10YR 4/2) moist; weak subangular block structure parting to moderate medium and fine granular structure; soft, friable; common very fine roots; common very fine pores; abrupt boundary. |
| <b>Soil 2</b>                                |                 |                                                                                                                                                                                                                                                  |
| 34-45                                        | Ab              | Dark grayish brown (10YR 4/2) loam, very dark grayish brown (10YR 3/2) moist; moderate medium granular structure; slightly hard, friable; common fine and few very fine roots; common very fine pores; common worm casts; clear boundary.        |
| 45-70                                        | C1b             | Grayish brown (10YR 5/2) loam grading down to medium-very coarse sand, dark grayish brown (10YR 4/2) moist; massive; soft, friable; common fine and very fine roots; abrupt boundary.                                                            |
| 70-150                                       | C2b             | Pale brown (10YR 6/3) coarse-very coarse sand and very fine pebble gravel, brown (10YR 5/3) moist; single grain; loose; common fine roots.                                                                                                       |

Table S3. Description of section RR-1

Landform: T-0c floodplain complex.  
 GPS Location: -99.201054, 40.070729 (NAD 83)  
 Slope: 0%  
 Parent material: Alluvium  
 Elevation above river channel: 3.3 m  
 Remarks: Soil organic matter from the upper 10 cm of Soil 2 (96-106 cm) yielded a radiocarbon ages of 430±30 yr. B.P.

| Depth<br>(cm) | Soil<br>Horizon | Description                                                                                                                                                                                                                                                                                                         |
|---------------|-----------------|---------------------------------------------------------------------------------------------------------------------------------------------------------------------------------------------------------------------------------------------------------------------------------------------------------------------|
| <b>Soil 1</b> |                 |                                                                                                                                                                                                                                                                                                                     |
| 0-5           | A               | Brown (10YR 5/3) gravelly loamy sand, brown (10YR 4/3) moist; very weak fine subangular blocky structure; very soft, very friable; many granules and fine pebbles (40-50%); many fine and very fine and common medium roots; gradual smooth boundary.                                                               |
| 5-15          | AC              | Pale brown (10YR 6/3) loamy fine sand; very weak fine subangular blocky structure; very soft, very friable; many fine and very fine roots; many worm casts and open worm and insect burrows; gradual smooth boundary.                                                                                               |
| 15-53         | C1              | Laminated pale brown (10YR 6/3) and brown (10YR 5/3) fine and very fine sand, brown (10YR 5/3 and 4/3) moist; massive parting to single grain; very soft, loose; many very fine and common fine roots; abrupt smooth boundary.                                                                                      |
| 53-78         | C2              | Brown (10YR 4/3) loamy fine sand, dark brown (10YR 3/3) moist; massive parting to single grain; very soft, loose; many very fine and common fine roots; abrupt wavy boundary.                                                                                                                                       |
| 78-96         | C3              | Laminated very pale brown (10YR 7/3) fine sand, pale brown (10YR 6/3) moist; massive parting to single grain; very soft, loose; common fine roots; abrupt smooth boundary.                                                                                                                                          |
| <b>Soil 2</b> |                 |                                                                                                                                                                                                                                                                                                                     |
| 96-106        | Ab              | Dark grayish brown (10YR 4/2) silt loam, very dark grayish brown (10YR 3/2) moist; moderate medium and fine subangular blocky structure parting to moderate medium granular; slightly hard, friable; many very fine and common fine roots; many worm casts and open worm and insect burrows; clear smooth boundary. |
| 106-135       | Akb             | Grayish brown (10YR 5/2) silt loam, dark grayish brown (10YR                                                                                                                                                                                                                                                        |

4/2) moist; moderate medium subangular blocky structure parting to weak fine subangular blocky and moderate fine granular; slightly hard, friable; few (1%) fine threads of calcium carbonate; common very fine and fine roots; many worm casts and open worm and insect burrows; gradual smooth boundary.

|          |     |                                                                                                                                                                                             |
|----------|-----|---------------------------------------------------------------------------------------------------------------------------------------------------------------------------------------------|
| 135-150  | ACb | Brown (10YR 5/3) loamy fine sand, brown (10YR 4/3) moist; very weak fine subangular blocky structure; very soft, very friable; many very fine and common fine roots; clear smooth boundary. |
| 150-200+ | Cb  | Yellowish brown (10YR 5/4) fine sand, dark yellowish brown (10YR 4/4) moist; single grain; loose; few fine and very fine roots.                                                             |

---

Table S4. Description of core A-2.

Landform: T-0c floodplain complex  
 GPS Location: -99.423556, 40.094288 (NAD 83)  
 Slope: 0%  
 Parent material: Alluvium  
 Elevation above river channel: 3.0 m  
 Remarks: Soil organic matter from the upper 5 cm of the Ak1b1 horizon (100-105 cm) and the lower 5 cm of the Ak2b1 horizon (137-142 cm) of Soil 2 yielded radiocarbon ages of  $970 \pm 25$  and  $1515 \pm 25$  yr. B.P., respectively. Soil organic matter from the upper 5 cm of the Akb2 horizon (198-208 cm) of Soil 3 yielded a radiocarbon age of  $1775 \pm 30$  yr. B.P. Also, a plant macrofossil at a depth of 379 cm in the C3b2 horizon of Soil 3 yielded a modern radiocarbon age.

| Depth<br>(cm) | Soil<br>Horizon | Description                                                                                                                                                                                                                                                                                                               |
|---------------|-----------------|---------------------------------------------------------------------------------------------------------------------------------------------------------------------------------------------------------------------------------------------------------------------------------------------------------------------------|
| <b>Soil 1</b> |                 |                                                                                                                                                                                                                                                                                                                           |
| 0-15          | Ap              | Dark grayish brown (10YR 4/2) silt loam, very dark grayish brown (10YR 3/2) moist; moderate medium to fine granular structure; slightly hard, friable; common medium, fine, and many very fine roots; common medium and very fine pores; clear boundary.                                                                  |
| 15-45         | A               | Dark grayish brown (10YR 4/2) silt loam, very dark grayish brown (10YR 3/2) moist; weak medium to fine subangular blocky structure parting to moderate fine granular structure; slightly hard, friable; common very fine roots; many fine and very fine pores; common worm casts and cast filled burrows; clear boundary. |
| 45-70         | Bw              | Brown (10YR 5/3) silt loam, brown (10YR 4/3) moist; weak medium and fine subangular blocky structure; slightly hard, friable; common fine and very fine roots; common very fine pores; clear boundary.                                                                                                                    |
| 70-100        | Bk              | Brown (10YR 5/3) silt loam, brown (10YR 4/3) moist; weak medium prismatic structure parting to moderate medium subangular blocky; slightly hard, friable; few fine threads and flecks of calcium carbonate; few fine and very fine roots; common fine and many very fine pores; abrupt boundary.                          |
| <b>Soil 2</b> |                 |                                                                                                                                                                                                                                                                                                                           |
| 100-125       | Ak1b1           | Dark grayish brown (10YR 4/2) silt loam, very dark grayish brown (10YR 3/2) moist; moderate medium and fine subangular blocky structure parting to moderate fine granular; slightly hard, friable; common fine threads of calcium carbonate; common very fine                                                             |

|          |       |                                                                                                                                                                                                                                                                                                                                          |
|----------|-------|------------------------------------------------------------------------------------------------------------------------------------------------------------------------------------------------------------------------------------------------------------------------------------------------------------------------------------------|
|          |       | roots; few fine and many very fine pores; gradual boundary.                                                                                                                                                                                                                                                                              |
| 125-142  | Ak2b1 | Dark gray (10YR 4/1) silt loam, very dark gray (10YR 3/1) moist; moderate medium and fine subangular blocky structure parting to moderate fine granular; hard, friable; common fine threads of calcium carbonate; few very fine roots; common fine and many very fine pores; gradual boundary                                            |
| 142-178  | C1b1  | Light brownish gray (10YR 6/2) silt loam, grayish brown (10YR 5/2) moist; massive; very soft, very friable; common fine and many very fine pores; abrupt boundary.                                                                                                                                                                       |
| 178-198  | C2b1  | Grayish brown (10YR 5/2) silt loam, dark grayish brown (10YR 4/2) moist; massive; very soft, very friable; many very fine pores; abrupt boundary.                                                                                                                                                                                        |
|          |       | <b>Soil 3</b>                                                                                                                                                                                                                                                                                                                            |
| 198-230  | Akb2  | Dark gray (10YR 4/1) silt loam, very dark gray (10YR 3/1) moist; weak medium and fine subangular blocky structure parting to moderate fine granular; slightly hard, friable; few fine threads of calcium carbonate and few fine (1-3 mm) hard carbonate masses; common fine and many very fine pores; common worm casts; clear boundary. |
| 230-275  | C1b2  | Pale brown (10YR 6/3) silt loam, brown (10YR 5/3) moist; massive; soft, very friable; few fine and many very fine pores; abrupt boundary.                                                                                                                                                                                                |
| 275-330  | C2b2  | Laminated light brownish gray (10YR 6/2) silt loam, grayish brown (10YR 5/2) moist; massive; slightly hard, friable; many fine and very fine pores; abrupt boundary.                                                                                                                                                                     |
| 330-379  | C3b2  | Gray (10YR 5/1) silt loam, dark gray (10YR 4/1) moist; massive; soft, friable; common very fine pores; abrupt boundary.                                                                                                                                                                                                                  |
| 379-420+ | C4b2  | Pale brown (10YR 6/3) medium-coarse sand, brown (10YR 5/3) moist; massive parting to single grain; very soft, very friable.                                                                                                                                                                                                              |

---

Table S5. Description of core A-5.

| Landform: T-1 terrace                                                                                                                                                                                                                                                                                               |              |                                                                                                                                                                                                                                                                                                                |
|---------------------------------------------------------------------------------------------------------------------------------------------------------------------------------------------------------------------------------------------------------------------------------------------------------------------|--------------|----------------------------------------------------------------------------------------------------------------------------------------------------------------------------------------------------------------------------------------------------------------------------------------------------------------|
| GPS Location: -99.401227, 40.084265 (NAD 83)                                                                                                                                                                                                                                                                        |              |                                                                                                                                                                                                                                                                                                                |
| Slope: 1%                                                                                                                                                                                                                                                                                                           |              |                                                                                                                                                                                                                                                                                                                |
| Parent material: Alluvium                                                                                                                                                                                                                                                                                           |              |                                                                                                                                                                                                                                                                                                                |
| Elevation above river channel: 6.6 m                                                                                                                                                                                                                                                                                |              |                                                                                                                                                                                                                                                                                                                |
| Remarks: Soil organic matter from the upper 10 cm of Soil 2 (48-58 cm), Soil 3 (158-168) and Soil 4 (208-218 cm) yielded radiocarbon ages of 1015±30, 3505±35, and 4105±40 yr. B.P., respectively. Soil organic matter from the Btk3b3 horizon of Soil 4 (330-340 cm) yielded a radiocarbon age of 9115±60 yr. B.P. |              |                                                                                                                                                                                                                                                                                                                |
| Depth (cm)                                                                                                                                                                                                                                                                                                          | Soil Horizon | Description                                                                                                                                                                                                                                                                                                    |
| <b>Soil 1</b>                                                                                                                                                                                                                                                                                                       |              |                                                                                                                                                                                                                                                                                                                |
| 0-20                                                                                                                                                                                                                                                                                                                | A            | Dark grayish brown (10YR 4/2) silt loam, very dark grayish brown (10YR 3/2) moist; moderate medium granular structure; slightly hard, friable; common medium, many fine and very fine roots; common very fine pores; common worm casts; gradual boundary.                                                      |
| 20-48                                                                                                                                                                                                                                                                                                               | Bw           | Grayish brown (10YR 5/2) silt loam, dark grayish brown (10YR 4/2) moist; moderate medium subangular blocky structure parting to weak medium and fine granular; slightly hard, friable; many fine and very fine roots; common medium and many very fine pores; common worm casts in macropores; clear boundary. |
| <b>Soil 2</b>                                                                                                                                                                                                                                                                                                       |              |                                                                                                                                                                                                                                                                                                                |
| 48-83                                                                                                                                                                                                                                                                                                               | Ab1          | Dark grayish brown (10YR 4/2) silt loam, very dark grayish brown (10YR 3/2) moist; moderate medium and fine granular structure; slightly hard, friable; few fine and very fine roots; few medium and many very fine pores; common worm casts; gradual boundary.                                                |
| 83-120                                                                                                                                                                                                                                                                                                              | Bkb1         | Brown (10YR 5/3) silt loam, brown (10YR 4/3) moist; moderate medium subangular blocky structure; slightly hard, friable; few fine threads of calcium carbonate and few films on ped faces; common fine and very fine roots; few medium, common fine and many very fine pores; gradual boundary.                |
| 120-158                                                                                                                                                                                                                                                                                                             | Ckb1         | Pale brown (10YR 6/3) silt loam, brown (10YR 5/3) moist; massive; soft, friable; very few fine threads of calcium carbonate; few fine and very fine roots; common very fine pores; abrupt boundary.                                                                                                            |
| <b>Soil 3</b>                                                                                                                                                                                                                                                                                                       |              |                                                                                                                                                                                                                                                                                                                |
| 158-180                                                                                                                                                                                                                                                                                                             | Akb2         | Dark grayish brown (10YR 4/2) silt loam, very dark grayish brown                                                                                                                                                                                                                                               |



|         |        |                                                                                                                                                                                                                                                                                                                                                         |
|---------|--------|---------------------------------------------------------------------------------------------------------------------------------------------------------------------------------------------------------------------------------------------------------------------------------------------------------------------------------------------------------|
|         |        | (10YR 3/2) moist; weak fine subangular blocky structure parting to moderate medium and fine granular; slightly hard, friable; few fine threads of calcium carbonate; many very fine pores; gradual boundary.                                                                                                                                            |
| 180-208 | Ckb2   | Pale brown (10YR 6/3) silt loam, brown (10YR 5/3) moist; massive; very soft, friable; very few fine threads of calcium carbonate; few fine and very fine roots; common very fine pores; abrupt boundary.                                                                                                                                                |
| 208-230 | Akb3   | <b>Soil 4</b><br>Dark grayish brown (10YR 4/2) silt loam, very dark grayish brown (10YR 3/2) moist; weak medium subangular blocky structure parting to moderate medium granular; slightly hard, friable; common fine threads of calcium carbonate; few fine and very fine roots; many fine and very fine pores; many worm casts; clear boundary.        |
| 230-280 | Btk1b3 | Brown (10YR 5/3) silt loam, brown (10YR 4/3) moist; moderate medium prismatic structure parting to moderate medium subangular blocky; hard, friable; few distinct discontinuous dark grayish brown (10YR 4/2) clay films on ped faces; common fine threads of calcium carbonate; common fine and many very fine pores; gradual boundary.                |
| 280-310 | Btk2b3 | Brown (10YR 5/3) silt loam, brown (10YR 4/3) moist; weak medium prismatic structure parting to moderate medium subangular blocky; slightly hard, friable; common distinct discontinuous dark grayish brown (10YR 4/2) clay films on ped faces; common fine threads and films on ped faces of calcium carbonate; many very fine pores; gradual boundary. |
| 310-350 | Btk3b3 | Brown (10YR 5/3) silt loam, brown (10YR 4/3) moist; weak medium prismatic structure parting to moderate medium subangular blocky; slightly hard, friable; few distinct discontinuous dark grayish brown (10YR 4/2) clay films on ped faces; common fine threads of calcium carbonate; many very fine pores; gradual boundary.                           |
| 350-370 | BCKb3  | Pale brown (10YR 6/3) silt loam, brown (10YR 5/3) moist; weak medium subangular blocky structure; soft, friable; few fine threads of calcium carbonate; many very fine pores; gradual boundary.                                                                                                                                                         |
| 370-412 | Ckb3   | Pale brown (10YR 6/3) silt loam, brown (10YR 5/3) moist; massive; very soft, friable; very few fine threads of calcium carbonate; common very fine pores; abrupt boundary.                                                                                                                                                                              |

|          |      |                                                                                                                                                                                                                                                     |
|----------|------|-----------------------------------------------------------------------------------------------------------------------------------------------------------------------------------------------------------------------------------------------------|
| 412-467  | C1b3 | Stratified pale brown (10YR 6/3) silt loam, brown (10YR 5/3) moist; massive; very soft, very friable; abrupt boundary. Contains 1-2 cm-thick beds of light brownish gray (10YR 6/2) fine sand, grayish brown (10YR 5/2) moist; single grain; loose. |
| 467-550+ | C2b3 | Light brownish gray (10YR 6/2) medium-coarse sand, grayish brown (10YR 5/2) moist; single grain; loose. Contains medium to coarse chalk pebble gravel at 450 cm.                                                                                    |

---

Table S6. Description of core B-1.

Landform: T-2 terrace  
 GPS Location: -99.372767, 40.078407 (NAD 83)  
 Slope: 1%  
 Parent material: Loess mantled alluvium  
 Elevation above river channel: 13.9 m  
 Remarks: Soil organic matter from the Btkb1 horizon of Soil 2 (250-255 cm) yielded a radiocarbon age of 9250±60 yr. B.P.

| Depth<br>(cm) | Soil<br>Horizon | Description                                                                                                                                                                                                                                                                                                                                                                     |
|---------------|-----------------|---------------------------------------------------------------------------------------------------------------------------------------------------------------------------------------------------------------------------------------------------------------------------------------------------------------------------------------------------------------------------------|
| <b>Soil 1</b> |                 |                                                                                                                                                                                                                                                                                                                                                                                 |
| 0-15          | Ap              | Dark grayish brown (10YR 4/2) silt loam, dark grayish brown (10YR 3/2) moist; moderate fine granular structure; slightly hard, friable; many fine and very fine roots; many fine and very fine pores; many worm casts; clear boundary.                                                                                                                                          |
| 15-40         | A               | Dark grayish brown (10YR 4/2) silt loam, dark grayish brown (10YR 3/2) moist; weak fine subangular blocky structure parting to moderate medium granular; slightly hard, friable; common fine and very fine roots; common fine and very fine pores; many worm casts and cast filled burrows; clear boundary.                                                                     |
| 40-58         | AB              | Dark grayish brown (10YR 4/2) silt loam, dark grayish brown (10YR 3/2) moist; moderate medium and fine subangular blocky structure parting to moderate fine granular; slightly hard, friable; common fine and many very fine roots; common fine and many very fine pores; common worm casts and cast filled burrows; clear boundary.                                            |
| 58-80         | Bk1             | Grayish brown (10YR 5/2) silt loam, dark grayish brown (10YR 4/2) moist; weak medium prismatic structure parting to weak medium and fine subangular blocky; slightly hard, friable; few fine threads of calcium carbonate and few films on ped faces; common fine and very fine roots; common fine and many very fine pores; common worm cast filled burrows; gradual boundary. |
| 80-108        | Bk2             | Grayish brown (10YR 5/2) silt loam, dark grayish brown (10YR 4/2) moist; moderate medium prismatic structure parting to moderate medium subangular blocky; hard, friable; common fine threads of calcium carbonate, few films on ped faces, few 0.5-1 cm hard carbonate masses at 105-108 cm; common fine and very fine roots; many very fine pores; clear boundary.            |

|               |      |                                                                                                                                                                                                                                                                                                                                                                                          |
|---------------|------|------------------------------------------------------------------------------------------------------------------------------------------------------------------------------------------------------------------------------------------------------------------------------------------------------------------------------------------------------------------------------------------|
| 108-140       | BCK  | Light brownish gray (10YR 6/2) silt loam, grayish brown (10YR 5/2) moist; weak medium prismatic structure parting to weak medium and fine subangular blocky; slightly hard, friable; few fine threads of calcium carbonate; common very fine roots; many very fine pores; gradual boundary.                                                                                              |
| 140-190       | Ck1  | Light brownish gray (10YR 6/2) silt, grayish brown (10YR 5/2) moist; massive; slightly hard, friable; few fine threads of calcium carbonate; few very fine roots; common fine and very fine pores; gradual boundary.                                                                                                                                                                     |
| 190-216       | Ck2  | Light brownish gray (10YR 6/2) silt loam, grayish brown (10YR 5/2) moist; massive; soft, friable; few fine threads of calcium carbonate; few very fine roots; common fine and very fine pores; abrupt boundary.                                                                                                                                                                          |
| 216-235       | C    | Pale brown (10YR 6/3) loamy sand, brown (10YR 5/3) moist; massive parting to single grain; soft, friable; few very fine roots; few very fine pores; abrupt boundary.                                                                                                                                                                                                                     |
| <b>Soil 2</b> |      |                                                                                                                                                                                                                                                                                                                                                                                          |
| 235-300       | Btkb | Brown (10YR 5/3) silt loam, brown (10YR 4/3) moist; moderate medium prismatic structure parting to moderate medium subangular blocky; slightly hard, friable; few distinct discontinuous brown (10YR 4/3) clay films on ped faces; common fine and few very fine threads of calcium carbonate; few medium and common very fine pores; common worm cast filled burrows; gradual boundary. |
| 300-353       | Bkb  | Light brownish gray (10YR 6/2) silt loam, grayish brown (10YR 5/2) moist; weak medium prismatic structure parting to weak fine subangular blocky; slightly hard, friable; common fine and few very fine threads of calcium carbonate; many very fine pores; gradual boundary.                                                                                                            |
| 353-410       | Ck1b | Pale brown (10YR 6/3) silt, brown (10YR 5/3) moist; massive; very soft, very friable; very few very fine threads of calcium carbonate; common fine and many very fine pores; gradual boundary.                                                                                                                                                                                           |
| 410-535       | Ck2b | Stratified, pale brown (10YR 6/3) silt, brown (10YR 5/3) moist; massive; very soft, very friable; very few very fine threads of calcium carbonate; few fine and many very fine pores; abrupt boundary. Contains 5-10 cm-thick beds of pale brown (10YR 6/3) loamy sand; massive; slightly hard, friable; abrupt boundary.                                                                |

|          |      |                                                                                                                                                                                                                                                                                 |
|----------|------|---------------------------------------------------------------------------------------------------------------------------------------------------------------------------------------------------------------------------------------------------------------------------------|
| 535-600  | Ck3b | Pale brown (10YR 6/3) silt, brown (10YR 5/3) moist; massive; very soft, very friable; very few very fine threads of calcium carbonate; few fine and many very fine pores; gradual boundary.                                                                                     |
| 600-766  | C1b  | Pale brown (10YR 6/3) silt, brown (10YR 5/3) moist; massive; very soft, very friable; common fine and many very fine pores; abrupt boundary.                                                                                                                                    |
| 766-840+ | 2C2b | Stratified, pale brown (10YR 6/3) silt, brown (10YR 5/3) moist; massive; very soft, very friable; few fine and many very fine pores; abrupt boundary. Contains 5-15 cm-thick beds of brown (10YR 5/3) coarse-very coarse sand and very fine pebble gravel; single grain; loose. |

---

Table S7. Description of core C-1.

Landform: T-2 terrace  
 GPS Location: -99.206358, 40.071988 (NAD 83)  
 Slope: 1%  
 Parent material: Loess mantled alluvium  
 Elevation above river channel: 13.3 m  
 Remarks: Soil organic matter from the upper 5 cm of the Ak1b2 horizon (130-155 cm) and lower 5 cm of the Ak2b2 horizon (178-183 cm) of Soil 3 yielded radiocarbon ages of 5625±30 and 8205±30 yr. B.P., respectively.

| Depth (cm)    | Soil Horizon | Description                                                                                                                                                                                                                                                                             |
|---------------|--------------|-----------------------------------------------------------------------------------------------------------------------------------------------------------------------------------------------------------------------------------------------------------------------------------------|
| <b>Soil 1</b> |              |                                                                                                                                                                                                                                                                                         |
| 0-20          | A            | Dark grayish brown (10YR 4/2) loam, dark grayish brown (10YR 3/2) moist; moderate medium and fine granular structure; slightly hard, friable; many fine and very fine roots; many fine and very fine pores; gradual boundary.                                                           |
| 20-46         | C            | Light brownish gray (10YR 6/2) silt loam, grayish brown (10YR 5/2) moist; moderate medium platy structure parting to moderate fine angular blocky; slightly hard, friable; common fine and very fine roots; common very fine pores; abrupt boundary.                                    |
| <b>Soil 2</b> |              |                                                                                                                                                                                                                                                                                         |
| 46-80         | Akb1         | Dark grayish brown (10YR 4/2) silt loam, dark grayish brown (10YR 3/2) moist; moderate fine subangular blocky structure parting to moderate fine granular; slightly hard, friable; very few flecks of calcium carbonate; few very fine roots; common very fine pores; gradual boundary. |
| 80-98         | Bkb1         | Grayish brown (10YR 5/2) silt loam, dark grayish brown (10YR 4/2) moist; weak medium prismatic structure parting to weak medium and fine subangular blocky; slightly hard, friable; few fine threads of calcium carbonate; common fine and many very fine pores; gradual boundary.      |
| 98-130        | Ckb1         | Light brownish gray (10YR 6/2) silt loam, grayish brown (10YR 5/2) moist; massive; slightly hard, friable; few fine threads of calcium carbonate; few very fine roots; common fine and many very fine pores; gradual boundary.                                                          |
| <b>Soil 3</b> |              |                                                                                                                                                                                                                                                                                         |
| 130-155       | Ak1b2        | Dark grayish brown (10YR 5/2) silt loam, dark grayish brown                                                                                                                                                                                                                             |

|          |       |                                                                                                                                                                                                                                                                    |
|----------|-------|--------------------------------------------------------------------------------------------------------------------------------------------------------------------------------------------------------------------------------------------------------------------|
|          |       | (10YR 4/2) moist; moderate medium subangular blocky structure parting to moderate medium granular; slightly hard, friable; few fine and very fine threads of calcium carbonate; many very fine pores; clear boundary.                                              |
| 155-183  | Ak2b2 | Dark grayish brown (10YR 4/2) silt loam, dark grayish brown (10YR 3/2) moist; moderate medium angular blocky structure; hard, friable; many fine threads of calcium carbonate and common films on ped faces; common fine and many very fine pores; clear boundary. |
| 183-235  | Bkb2  | Brown (10YR 5/3) silt loam, brown (10YR 4/3) moist; moderate medium prismatic structure parting to moderate medium subangular blocky; hard, friable; common fine and few very fine threads of calcium carbonate; many very fine pores; gradual boundary.           |
| 235-260  | CBkb2 | Pale brown (10YR 6/3) silt loam, brown (10YR 5/3) moist; weak medium prismatic structure parting to weak medium and fine subangular blocky; soft, friable; common fine and very fine threads of calcium carbonate; many very fine pores; gradual boundary.         |
| 260-480+ | Ckb2  | Pale brown (10YR 6/3) silt loam, brown (10YR 5/3) moist; massive; soft, friable; common fine and very fine threads of calcium carbonate; common fine and many very fine pores.                                                                                     |

---

Table S8. Description of core A-6.

Landform: Alluvial fan (AF-0b).  
 GPS Location: -99.400571, 40.085781 (NAD 83)  
 Slope: 1%  
 Parent material: Alluvium  
 Elevation above river channel: 3.2 m  
 Remarks: Fan grades to the T-0b floodplain complex. Core taken at the apex of the fan.  
 Shell fragments at 110-115 cm.

| Depth<br>(cm) | Soil<br>Horizon | Description                                                                                                                                                                                                                                                                                                   |
|---------------|-----------------|---------------------------------------------------------------------------------------------------------------------------------------------------------------------------------------------------------------------------------------------------------------------------------------------------------------|
| <b>Soil 1</b> |                 |                                                                                                                                                                                                                                                                                                               |
| 0-20          | A               | Dark grayish brown (10YR 4/2) silt loam, very dark grayish brown (10YR 3/2) moist; weak medium and fine subangular blocky structure parting to moderate medium granular; slightly hard, friable; few medium, common fine and very fine roots; few fine and common very fine pores; clear boundary.            |
| 20-30         | AC              | Grayish brown (10YR 5/2) silt loam, dark grayish brown (10YR 4/2) moist; moderate medium and fine granular structure; soft, friable; common very fine pores; clear boundary.                                                                                                                                  |
| 30-62         | C1              | Pale brown (10YR 6/3) loamy sand, brown (10YR 5/3) moist; massive parting to single grain; very soft, very friable; abrupt boundary.                                                                                                                                                                          |
| 62-120        | C2              | Stratified, laminated brown (10YR 5/3) silt loam, brown (10YR 4/3) moist; massive; soft, friable; many very fine pores; abrupt boundary. Contains 10-15 cm-thick beds of pale brown (10YR 6/3) loamy sand, brown (10YR 5/3) moist; massive parting to single grain; very soft, very friable; abrupt boundary. |
| 120-170       | C3              | Stratified, laminated brown (10YR 5/3) silt loam, brown (10YR 4/3) moist; massive; soft, friable; many very fine pores; abrupt boundary. Contains 1-5 cm-thick beds of light brownish gray (10YR 6/2) coarse-very coarse sand, grayish brown (10YR 5/2) moist; single grain; loose; abrupt boundary.          |
| 170-215       | C4              | Pale brown (10YR 6/3) loamy sand, brown (10YR 5/3) moist; massive parting to single grain; soft, friable; common very fine pores; abrupt boundary.                                                                                                                                                            |
| 215-267       | C5              | Light brownish gray (10YR 6/2) coarse-very coarse sand, grayish                                                                                                                                                                                                                                               |



|          |    |                                                                                                                                                                              |
|----------|----|------------------------------------------------------------------------------------------------------------------------------------------------------------------------------|
|          |    | brown (10YR 5/2) moist; single grain; loose; abrupt boundary.                                                                                                                |
| 267-350  | C6 | Laminated grayish brown (10YR 5/2) loamy sand, dark grayish brown (10YR 4/2) moist; massive parting to single grain; soft, friable; common very fine pores; abrupt boundary. |
| 350-380+ | C7 | Light brownish gray (10YR 6/2) coarse-very coarse sand and very fine pebble gravel, grayish brown (10YR 5/2) moist; single grain; loose.                                     |

---

Table S9. Description of core A-4.

Landform: Alluvial fan (AF-0c).  
 GPS Location: -99.411511, 40.090578 (NAD 83)  
 Slope: 1%  
 Parent material: Alluvium  
 Elevation above river channel: 3.1 m  
 Remarks: Fan grades to the T-0c floodplain surface. Core taken on the distal portion of the fan. Soil organic matter from the upper 10 cm of Soil 2 (97-107 cm) yielded a radiocarbon age of 1185±30 yr. B.P. Soil organic matter the upper and lower 10 cm of Soil 3 (150-160 cm and 186-196 cm, respectively) yielded radiocarbon ages of 1210±25 and 1815±25 yr. B.P. Soil organic matter from the upper 10 cm of the A1b3 and A2b3 horizons of Soil 4 (233-243 cm and 271-281 cm, respectively) yielded radiocarbon ages of 2010±30 and 1915±30 yr. B.P. Gastropod shells were found at 272 and 278 cm in the A2b3 horizon of Soil 4.

| Depth (cm)    | Soil Horizon | Description                                                                                                                                                                                                                                                                                                                                                                                                                   |
|---------------|--------------|-------------------------------------------------------------------------------------------------------------------------------------------------------------------------------------------------------------------------------------------------------------------------------------------------------------------------------------------------------------------------------------------------------------------------------|
| <b>Soil 1</b> |              |                                                                                                                                                                                                                                                                                                                                                                                                                               |
| 0-20          | A            | Dark grayish brown (10YR 4/2) loam, very dark grayish brown (10YR 3/2) moist; weak medium subangular structure parting to moderate medium granular; slightly hard, friable; common fine and very fine roots; common very fine pores; clear boundary.                                                                                                                                                                          |
| 20-82         | C1           | Light brownish gray (10YR 6/2) loam grading down to fine to very fine sand, grayish brown (10YR 5/2) moist; massive parting to single grain; soft, friable; few very fine roots; abrupt boundary.                                                                                                                                                                                                                             |
| 82-97         | C2           | Stratified, weakly laminated light brownish gray (10YR 6/2) very fine sand, grayish brown (10YR 5/2) moist; massive parting to single grain; very soft, very friable; abrupt boundary. Contains 1-5 cm-thick beds of laminated dark gray (10YR 4/1) silty clay loam, very dark gray (10YR 3/1) moist; weak subangular blocky structure; hard, friable; few very fine and fine roots; common very fine pores; abrupt boundary. |
| <b>Soil 2</b> |              |                                                                                                                                                                                                                                                                                                                                                                                                                               |
| 97-121        | Akb1         | Dark grayish brown (10YR 4/2) silt loam, very dark grayish brown (10YR 3/2) moist; weak fine subangular blocky structure parting to moderate medium granular; slightly hard, friable; very few fine threads of calcium carbonate; few fine and very fine roots; few fine and many very fine pores; clear boundary.                                                                                                            |
| 121-150       | Cb1          | Weakly laminated light brownish gray (10YR 6/2) very fine sand,                                                                                                                                                                                                                                                                                                                                                               |

grayish brown (10YR 5/2) moist, interbedded with 1-2 cm thick beds of very dark gray (10YR 3/1) silt loam; massive; soft, very friable; abrupt boundary.

|          |      |                                                                                                                                                                                                                                                                                                    |
|----------|------|----------------------------------------------------------------------------------------------------------------------------------------------------------------------------------------------------------------------------------------------------------------------------------------------------|
| 150-196  | Ab2  | <p><b>Soil 3</b></p> <p>Dark gray (10YR 4/1) silt loam, very dark gray (10YR 3/1) moist; weak fine subangular blocky structure parting to moderate fine granular; slightly hard, friable; few fine and common very fine roots; many fine and very fine pores; many worm casts; clear boundary.</p> |
| 196-233  | Cb2  | <p>Weakly laminated gray (10YR 6/1) fine sand, gray (10YR 5/1) moist; massive; soft, friable; common fine and many very fine pores; abrupt boundary.</p>                                                                                                                                           |
| 233-271  | A1b3 | <p><b>Soil 4</b></p> <p>Grayish brown (10YR 5/2) silty clay loam, dark grayish brown (10YR 4/2) moist; weak medium and fine subangular blocky structure parting to moderate medium granular; hard, friable; common very fine pores; clear boundary.</p>                                            |
| 271-300  | A2b3 | <p>Dark grayish brown (10YR 4/2) silt loam, very dark grayish brown (10YR 3/2) moist; moderate fine subangular blocky structure parting to moderate medium and fine granular; slightly hard, friable; common very fine pores; gradual boundary.</p>                                                |
| 300-420+ | Cb3  | <p>Stratified pale brown (10YR 6/3) medium-coarse sand, brown (10YR 5/3) moist; massive parting to single grain; very soft, very friable. Contains 10-20 cm-thick beds of laminated gray (10YR 6/1) fine sand, gray (10YR 5/1) moist; massive; soft, friable.</p>                                  |

---

Table S10. Description of core C-2

Landform: Alluvial fan (AF-0c).  
 GPS Location: -99.20389, 40.057451 (NAD 83)  
 Slope: 1%  
 Parent material: Alluvium  
 Elevation above river channel: 7.2 m  
 Remarks: Fan grades to the T-0c floodplain surface. Core taken near the apex of the fan.  
 Soil organic matter from the upper 5 cm of Soil 2 (69-74 cm) and Soil 3 (267-272) yielded radiocarbon ages of 1300±25 and 1680±20 yr. B.P., respectively.

| Depth (cm)    | Soil Horizon | Description                                                                                                                                                                                                                                                      |
|---------------|--------------|------------------------------------------------------------------------------------------------------------------------------------------------------------------------------------------------------------------------------------------------------------------|
| <b>Soil 1</b> |              |                                                                                                                                                                                                                                                                  |
| 0-10          | Ap           | Dark grayish brown (10YR 4/2) silt loam, dark grayish brown (10YR 3/2) moist; moderate medium granular structure; slightly hard, friable; common medium, many fine, and common very fine roots; common fine and very fine pores; clear boundary.                 |
| 10-32         | A            | Dark grayish brown (10YR 4/2) silt loam, dark grayish brown (10YR 3/2) moist; weak subangular blocky structure parting to moderate medium granular; slightly hard, friable; many fine and very fine roots; common fine and many very fine pores; clear boundary. |
| 32-59         | AC           | Grayish brown (10YR 5/2) silt loam, dark grayish brown (10YR 4/2) moist; weak fine subangular blocky structure parting to moderate medium and fine granular; soft, friable; many fine and very fine roots; many very fine pores; clear boundary.                 |
| 59-69         | C            | Weakly laminated light brownish gray (10YR 6/2) silt loam, grayish brown (10YR 5/2) moist; massive; soft, very friable; common very fine pores; abrupt boundary. Contains 1 cm-thick bed of medium-coarse sand at 68 cm.                                         |
| <b>Soil 2</b> |              |                                                                                                                                                                                                                                                                  |
| 69-86         | Ab1          | Grayish brown (10YR 5/2) loam, dark grayish brown (10YR 4/2) moist; moderate medium and fine granular; slightly hard, friable; many fine and very fine roots; many fine and very fine pores; clear boundary.                                                     |
| 86-160        | C1b1         | Pale brown (10YR 6/3) loamy sand, brown (10YR 5/3) moist; massive parting to single grain; soft, friable; common fine and very fine roots; abrupt boundary. Contains very fine to medium                                                                         |

pebble gravel clasts at 105 cm.

|          |      |                                                                                                                                                                                                                                                                                                                                           |
|----------|------|-------------------------------------------------------------------------------------------------------------------------------------------------------------------------------------------------------------------------------------------------------------------------------------------------------------------------------------------|
| 160-199  | C2b1 | Stratified, brown (10YR 5/3) medium-very coarse sand and very fine pebble gravel, brown (10YR 4/3) moist; massive parting to single grain; soft, friable; abrupt boundary. Contains 15-30 cm-thick beds of pale brown (10YR 6/3) silt loam, brown (10YR 5/3) moist; massive; very soft, friable; common very fine pores; abrupt boundary. |
| 199-267  | C3b1 | Laminated light brownish gray (10YR 6/2) silt loam, grayish brown (10YR 5/2) moist; massive; soft, friable; few very fine pores; abrupt boundary.                                                                                                                                                                                         |
| 267-290  | Ab2  | <b>Soil 3</b><br>Dark grayish brown (10YR 4/2) silt loam, dark grayish brown (10YR 3/2) moist; moderate medium and fine granular structure; slightly hard, friable; common fine and many very fine pores; common worm casts; clear boundary.                                                                                              |
| 290-310  | ACb2 | Dark grayish brown (10YR 4/2) silt loam, dark grayish brown (10YR 3/2) moist; weak fine granular structure; soft, friable; many very fine pores; common worm cast filled burrows; clear boundary.                                                                                                                                         |
| 310-371  | C1b2 | Laminated pale brown (10YR 6/3) silt loam, brown (10YR 5/3) moist; massive; soft, friable; common fine and many very fine pores; abrupt boundary.                                                                                                                                                                                         |
| 371-470  | C2b2 | Weakly laminated pale brown (10YR 6/3) very fine sand, brown (10YR 5/3) moist; massive; very soft, very friable; common very fine pores; abrupt boundary.                                                                                                                                                                                 |
| 470-490+ | C3b2 | Light brownish gray (10YR 6/2) medium-coarse sand, grayish brown (10YR 5/2) moist; massive parting to single grain; very soft, very friable.                                                                                                                                                                                              |

---

Table S11. Description of core A-1.

Landform: Alluvial fan (AF-1).  
 GPS Location: -99.423583, 40.08728 (NAD 83)  
 Slope: 2%  
 Parent material: Alluvium  
 Elevation above river channel: 8.0 m  
 Remarks: Fan grades to the T-1 terrace surface. Core taken on the axial portion close to valley wall.  
 Soil organic matter from the upper 5 cm of Soil 2 (173-178 cm) and Soil 3 (397-402 cm) yielded radiocarbon ages of  $1770 \pm 25$  and  $3125 \pm 25$  yr. B.P., respectively.

| Depth<br>(cm) | Soil<br>Horizon | Description                                                                                                                                                                                                                                                                                                                                                              |
|---------------|-----------------|--------------------------------------------------------------------------------------------------------------------------------------------------------------------------------------------------------------------------------------------------------------------------------------------------------------------------------------------------------------------------|
| <b>Soil 1</b> |                 |                                                                                                                                                                                                                                                                                                                                                                          |
| 0-15          | Ap              | Dark grayish brown (10YR 4/2) silt loam, dark grayish brown (10YR 3/2) moist; weak fine granular structure; soft, friable; many fine and very fine roots; many worm casts; clear boundary.                                                                                                                                                                               |
| 15-26         | A               | Dark grayish brown (10YR 4/2) silt loam, very dark grayish brown (10YR 3/2) moist; moderate medium and fine subangular blocky structure parting moderate medium and fine granular; hard, friable; many fine and very fine roots; many fine and very fine pores; common worm casts; clear boundary.                                                                       |
| 26-75         | AB              | Grayish brown (10YR 5/2) silt loam, dark grayish brown (10YR 4/2) moist; moderate medium subangular blocky structure parting to weak medium granular; slightly hard, friable; common fine and very fine roots; few medium, common fine and many very fine pores; common worm casts in macropores; clear boundary.                                                        |
| 75-105        | Bk1             | Light brownish gray (10YR 6/2) silt loam, grayish brown (10YR 5/2) moist; weak medium prismatic structure parting to moderate medium subangular blocky; slightly hard, friable; few fine threads and flecks of calcium carbonate; few fine and common very fine roots; few medium, common fine and many very fine pores; few worm casts in macropores; gradual boundary. |
| 105-145       | Bk2             | Light brownish gray (10YR 6/2) silt loam, grayish brown (10YR 5/2) moist; weak medium prismatic structure parting to weak fine subangular blocky; slightly hard, friable; common fine threads and flecks of calcium carbonate; few fine and very fine roots; few medium, few fine and many very fine pores; few worm casts in macropores; clear boundary.                |

|               |       |                                                                                                                                                                                                                                                                                                                        |
|---------------|-------|------------------------------------------------------------------------------------------------------------------------------------------------------------------------------------------------------------------------------------------------------------------------------------------------------------------------|
| 145-173       | Ck    | Pale brown (10YR 6/3) silt loam grading down to loamy fine sand, brown (10YR 5/3) moist; massive; soft, friable; very few fine threads of calcium carbonate; common very fine pores; abrupt boundary.                                                                                                                  |
| <b>Soil 2</b> |       |                                                                                                                                                                                                                                                                                                                        |
| 173-189       | Ak1b1 | Grayish brown (10YR 5/2) silt loam, dark grayish brown (10YR 4/2) moist; weak fine subangular blocky structure parting to moderate fine granular; slightly hard, friable; few fine threads of calcium carbonate; common fine and many very fine pores; gradual boundary.                                               |
| 189-205       | Ak2b1 | Dark grayish brown (10YR 4/2) silt loam, very dark grayish brown (10YR 3/2) moist; moderate medium subangular blocky structure; slightly hard, friable; common fine threads of calcium carbonate; common fine and many very fine pores; clear boundary.                                                                |
| 205-235       | Bk1b1 | Brown (10YR 5/3) silt loam, brown (10YR 4/3) moist; weak medium prismatic structure parting to moderate medium and fine subangular blocky; slightly hard, friable; common fine threads of calcium carbonate and few films on ped faces; common fine and many very fine pores; gradual boundary.                        |
| 235-265       | Bk2b1 | Brown (10YR 5/3) silt loam, brown (10YR 4/3) moist; weak medium prismatic structure parting to weak fine subangular blocky; slightly hard, friable; few fine threads of calcium carbonate and few films on ped faces; common fine and many very fine pores; gradual boundary.                                          |
| 265-300       | BCKb1 | Pale brown (10YR 6/3) silt loam, brown (10YR 5/3) moist; very weak medium prismatic structure parting to weak fine subangular blocky; soft, friable; very few fine threads of calcium carbonate; many very fine pores; gradual boundary.                                                                               |
| 300-397       | Ckb1  | Laminated pale brown (10YR 6/3) silt loam, brown (10YR 5/3) moist; massive; very soft, very friable; very few fine threads of calcium carbonate; common fine and many very fine pores; abrupt boundary.                                                                                                                |
| <b>Soil 3</b> |       |                                                                                                                                                                                                                                                                                                                        |
| 397-425       | Akb2  | Dark grayish brown (10YR 4/2) silt loam, very dark grayish brown (10YR 3/2) moist; weak medium and fine subangular blocky structure parting to moderate medium granular; slightly hard, friable; few fine threads of calcium carbonate; few fine and very fine roots; many fine and very fine pores; gradual boundary. |

|         |       |                                                                                                                                                                                                                                                                                   |
|---------|-------|-----------------------------------------------------------------------------------------------------------------------------------------------------------------------------------------------------------------------------------------------------------------------------------|
| 425-470 | Bkb2  | Brown (10YR 5/3) silt loam, brown (10YR 4/3) moist; moderate medium prismatic structure parting to moderate medium subangular blocky; slightly hard, friable; few fine threads of calcium carbonate; few very fine roots; common fine and many very fine pores; gradual boundary. |
| 470-510 | BCkb2 | Pale brown (10YR 6/3) silt loam, brown (10YR 5/3) moist; weak medium subangular blocky structure; soft, friable; few fine threads of calcium carbonate; many very fine pores; gradual boundary.                                                                                   |
| 510-560 | Cb2   | Pale brown (10YR 6/3) silt loam, brown (10YR 5/3) moist; massive; soft, friable; many fine and very fine pores; abrupt boundary.                                                                                                                                                  |

---



Table S12. Description of section MC-1

Landform: Co-alluvial fan (AF-1)  
 GPS Location: -99.355023, 40.071606 (NAD 83)  
 Slope: 1%.  
 Parent material: Alluvium and colluvium  
 Elevation above river channel: 10.0 m  
 Remarks: Fan is interpreted as grading to the T-1 terrace surface. Soil organic matter from the upper 10 cm of Soil 2 (71-81 cm), Soil 3 (118-128 cm), Soil 4 (190-200 cm), Soil 5 (360-370 cm), and Soil 6 (507-517 cm) yielded radiocarbon ages of 880±25, 2165±30, 3665±30, 5915±50, and 9485±40 yr. B.P., respectively.

| Depth<br>(cm)   | Soil<br>Horizon | Description                                                                                                                                                                                                                                                                                                    |
|-----------------|-----------------|----------------------------------------------------------------------------------------------------------------------------------------------------------------------------------------------------------------------------------------------------------------------------------------------------------------|
| <b>ALLUVIUM</b> |                 |                                                                                                                                                                                                                                                                                                                |
| <b>Soil 1</b>   |                 |                                                                                                                                                                                                                                                                                                                |
| 0-24            | A               | Dark grayish brown (10YR 4/2) silt loam, very dark grayish brown (10YR 3/2) moist; weak fine subangular blocky structure parting to moderate medium and fine granular; soft, very friable; many fine and very fine roots; many worm casts and open worm and insect burrows; gradual smooth boundary.           |
| 24-36           | AB              | Dark grayish brown (10YR 4/2) silt loam, very dark grayish brown (10YR 3/2) moist; weak medium prismatic structure parting to weak fine subangular blocky; slightly hard, friable; many fine and very fine and common medium roots; many worm casts and open worm and insect burrows; gradual smooth boundary. |
| 36-55           | Bw              | Brown (10YR 5/3) silt loam, brown (10YR 4/3) moist; weak medium prismatic structure parting to weak fine subangular blocky; slightly hard, friable; many fine and very fine and common medium roots; many worm casts and open worm and insect burrows; gradual smooth boundary.                                |
| 55-71           | BC              | Faintly laminated pale brown (10YR 6/3) silt loam, brown (10YR 5/3) moist; very weak medium prismatic structure parting to very weak fine subangular blocky; slightly hard, friable; common fine and many very fine roots; common fine and many very fine pores; abrupt smooth boundary.                       |

**Soil 2**

|         |      |                                                                                                                                                                                                                                                                                                                                                                                                                                 |
|---------|------|---------------------------------------------------------------------------------------------------------------------------------------------------------------------------------------------------------------------------------------------------------------------------------------------------------------------------------------------------------------------------------------------------------------------------------|
| 71-95   | Akb1 | Dark grayish brown (10YR 4/2) silt loam, very dark grayish brown (10YR 3/2) moist; weak medium to coarse prismatic structure parting to moderate fine granular; slightly hard, friable; few (1-2%) flecks and very fine threads of calcium carbonate; common fine and very fine roots; common worm casts and open worm and insect burrows; many fine and very fine pores; gradual smooth boundary.                              |
| 95-118  | Bkb1 | Brown (10YR 5/3) silt loam, brown (10YR 4/3) moist; moderate medium prismatic structure parting to moderate medium and fine subangular blocky; slightly hard, friable; common (3-5%) fine and medium threads of calcium carbonate; common fine and very fine roots; common worm casts and open worm and insect burrows; many fine and very fine pores; abrupt smooth boundary.                                                  |
| 118-135 | Akb2 | <b>Soil 3</b><br>Dark grayish brown (10YR 4/2) silt loam, very dark grayish brown (10YR 3/2) moist; weak medium subangular blocky structure parting to moderate medium and fine granular; slightly hard, very friable; common (3-4%) fine and very fine threads of calcium carbonate; common fine and very fine roots; few worm casts and open worm and insect burrows; many fine and very fine pores; gradual smooth boundary. |
| 135-190 | Bkb2 | Brown (10YR 5/3) silt loam, brown (10YR 4/3) moist; weak medium prismatic structure parting to moderate medium subangular blocky; slightly hard, friable; common (3-5%) fine flecks of calcium carbonate; common fine and very fine roots; few open worm and insect burrows; many fine and very fine pores; abrupt smooth boundary.                                                                                             |
| 190-220 | Akb3 | <b>Soil 4</b><br>Dark grayish brown (10YR 4/2) loam, very dark grayish brown (10YR 3/2) moist; moderate medium subangular blocky structure parting to moderate medium and fine granular; slightly hard, very friable; common (5-8%) films and threads of calcium carbonate; few very fine roots; common worm casts and open worm and insect burrows; many fine and very fine pores; gradual smooth boundary.                    |
| 220-235 | Bkb3 | Brown (10YR 5/3) fine sandy loam, brown (10YR 4/3) moist; weak medium and fine subangular blocky structure; slightly hard, very friable; common (5-8%) films and threads of calcium carbonate; few very fine roots; few open worm and insect                                                                                                                                                                                    |

|                  |         |                                                                                                                                                                                                                                                                                                                                                                                                                                                                                                                                                                              |
|------------------|---------|------------------------------------------------------------------------------------------------------------------------------------------------------------------------------------------------------------------------------------------------------------------------------------------------------------------------------------------------------------------------------------------------------------------------------------------------------------------------------------------------------------------------------------------------------------------------------|
|                  |         | burrows; many fine and common very fine pores; gradual smooth boundary.                                                                                                                                                                                                                                                                                                                                                                                                                                                                                                      |
| 235-255          | BCkb3   | Brown (10YR 5/3) loamy fine sand, brown (10YR 4/3) moist; weak medium and fine subangular blocky structure; slightly hard, very friable; few (1-2%) fine and very fine threads of calcium carbonate; few medium and fine roots; many very fine pores; gradual smooth boundary.                                                                                                                                                                                                                                                                                               |
| 255-360          | Cb3     | Stratified brown (10YR 5/3), yellowish brown (10YR 5/4), and pale brown (10YR 6/3) sand; single grain; loose; few thin beds of granules and fine pebbles; abrupt smooth boundary.                                                                                                                                                                                                                                                                                                                                                                                            |
| <b>COLLUVIUM</b> |         |                                                                                                                                                                                                                                                                                                                                                                                                                                                                                                                                                                              |
| <b>Soil 5</b>    |         |                                                                                                                                                                                                                                                                                                                                                                                                                                                                                                                                                                              |
| 360-395          | 2ABkb4  | Dark grayish brown (10YR 4/2) silty clay loam, very dark grayish brown (10YR 3/2) moist; moderate coarse and medium prismatic structure subangular blocky structure parting to moderate medium angular blocky; hard, friable; many (10-15%) very fine, fine and medium films and threads of calcium carbonate; common fine shale fragments scattered through the fine-grained matrix; few very fine roots; common worm casts and open worm and insect burrows; gradual smooth boundary.                                                                                      |
| 395-417          | 2Btkb4  | Dark grayish brown (10YR 4/2) silty clay loam, very dark grayish brown (10YR 3/2) moist; moderate coarse and medium prismatic structure subangular blocky structure parting to moderate medium angular blocky; hard, friable; common distinct discontinuous very dark grayish brown (2.5Y 3/2) clay films on ped faces; common (5-8%) very fine, fine and medium films and threads of calcium carbonate; common shale fragments scattered through the fine-grained matrix; few very fine roots; common worm casts and open worm and insect burrows; gradual smooth boundary. |
| 417-507          | 2BCkb4  | Alternating beds of dark gray (10YR 4/1) clay loam, very dark gray (10YR 3/1) moist, and brown (10YR 5/3) heavy silty clay loam, brown (10YR 4/3) moist; very weak fine prismatic structure parting to very weak fine subangular blocky; hard, friable; common (4-5%) fine and very fine threads of calcium carbonate; many fragments of shale scattered through the fine-grained matrix; beds are 10-20 cm thick; clear smooth boundary.                                                                                                                                    |
| <b>Soil 6</b>    |         |                                                                                                                                                                                                                                                                                                                                                                                                                                                                                                                                                                              |
| 507-532          | 2Btk1b5 | Brown (10YR 5/3) clay loam, brown (10YR 4/3) moist; moderate medium prismatic structure parting to moderate                                                                                                                                                                                                                                                                                                                                                                                                                                                                  |

|          |         |                                                                                                                                                                                                                                                                                                                                                                                                                                         |
|----------|---------|-----------------------------------------------------------------------------------------------------------------------------------------------------------------------------------------------------------------------------------------------------------------------------------------------------------------------------------------------------------------------------------------------------------------------------------------|
|          |         | medium and fine subangular blocky; very hard, very firm; common distinct discontinuous dark grayish brown (10YR 4/2) clay films on ped faces; common (4-5%) very fine, fine and medium threads of calcium carbonate; many fragments of shale scattered through the fine-grained matrix; few very fine roots; many very fine pores; gradual smooth boundary.                                                                             |
| 532-560  | 2Btk2b5 | Brown (10YR 5/3) heavy silty clay loam, brown (10YR 4/3) moist; very weak medium and fine subangular blocky; slightly hard, friable; common distinct discontinuous dark grayish brown (10YR 4/2) clay films on ped faces; common (3-4%) very fine, fine and medium threads of calcium carbonate; many fragments of shale scattered through the fine-grained matrix; few very fine roots; many very fine pores; gradual smooth boundary. |
| 560-620  | 2CBkb5  | Brown (10YR 5/3) heavy silty clay loam, brown (10YR 4/3) moist; moderate medium prismatic structure parting to weak medium subangular blocky; hard, friable; common (3-4%) very fine, fine and medium threads of calcium carbonate; many fragments of shale scattered through the fine-grained matrix; few very fine roots; many very fine pores; abrupt wavy boundary.                                                                 |
| 620-630+ | 3R      | <b>BEDROCK</b><br>Shale                                                                                                                                                                                                                                                                                                                                                                                                                 |

Table S13. Description of core B-2

Landform: Co-Alluvial fan (AF-2)/T-2 terrace  
 GPS Location: -99.274248, 40.071235 (NAD 83)  
 Slope: 1%  
 Parent material: Alluvium, colluvium, and loess  
 Elevation above river channel: 19.1 m  
 Remarks: Fan grades to the T-2 terrace surface. Soil organic matter from the upper 10 cm of the Akb1 and Bk2b1 horizons of Soil 2 (37-47 and 100-110 cm, respectively) yielded radiocarbon ages of 1220±30 and 4525±35 yr. B.P. Soil organic matter from the upper 10 cm of the Ak1b2 horizon (215-225 cm), the Ak2b2 horizon (260-270 cm), the BAtkb2 horizon (320-330 cm), the Btk1b2 horizon (370-380 cm), and the Btk2b2 horizon (450-460 cm) of Soil 3 yielded radiocarbon ages of 9550±50, 10,080±60, 10,980±60, 14,140±45 and 16,410±60 yr. B.P., respectively.

| Depth<br>(cm)                 | Soil<br>Horizon | Description                                                                                                                                                                                                                                                                                                            |
|-------------------------------|-----------------|------------------------------------------------------------------------------------------------------------------------------------------------------------------------------------------------------------------------------------------------------------------------------------------------------------------------|
| <b>ALLUVIUM AND COLLUVIUM</b> |                 |                                                                                                                                                                                                                                                                                                                        |
| <b>Soil 1</b>                 |                 |                                                                                                                                                                                                                                                                                                                        |
| 0-15                          | A               | Dark grayish brown (10YR 4/2) silt loam, dark grayish brown (10YR 3/2) moist; moderate fine and medium granular structure; slightly hard, friable; many fine and very fine roots; common fine and very fine pores; many worm casts; clear boundary.                                                                    |
| 15-37                         | Bw              | Grayish brown (10YR 5/2) silt loam, dark grayish brown (10YR 4/2) moist; weak fine subangular blocky structure parting to weak fine granular; soft, friable; common fine and very fine roots; common very fine pores; abrupt boundary.                                                                                 |
| <b>Soil 2</b>                 |                 |                                                                                                                                                                                                                                                                                                                        |
| 37-55                         | Akb1            | Dark grayish brown (10YR 4/2) silt loam, dark grayish brown (10YR 3/2) moist; moderate medium subangular blocky structure parting to moderate medium granular; slightly hard, friable; few fine threads of calcium carbonate; many fine and very fine roots; few very fine pores; common worm casts; gradual boundary. |
| 55-100                        | Bk1b1           | Brown (10YR 5/3) silt loam, brown (10YR 4/3) moist; moderate medium prismatic structure parting to moderate medium subangular blocky; hard, friable; common fine threads of calcium carbonate and films on ped faces; common fine and very fine roots; common very fine pores; few worm casts; gradual boundary.       |
| 100-120                       | Bk2b1           | Brown (10YR 5/3) silt loam, brown (10YR 4/3) moist; moderate medium subangular blocky structure; slightly hard, friable; few                                                                                                                                                                                           |

very fine threads of calcium carbonate; few fine and very fine roots; common very fine pores; few worm casts; gradual boundary.

### **BIGNELL LOESS**

#### **Soil 3**

|         |       |                                                                                                                                                                                                                                                                                                                                            |
|---------|-------|--------------------------------------------------------------------------------------------------------------------------------------------------------------------------------------------------------------------------------------------------------------------------------------------------------------------------------------------|
| 120-155 | 2Bkb2 | Grayish brown (10YR 5/2) silt loam, dark grayish brown (10YR 4/2) moist; moderate medium to fine subangular blocky structure parting to moderate medium granular; slightly hard, friable; common fine threads of calcium carbonate and common films on ped faces; few fine roots; many very fine pores; common worm casts; clear boundary. |
|---------|-------|--------------------------------------------------------------------------------------------------------------------------------------------------------------------------------------------------------------------------------------------------------------------------------------------------------------------------------------------|

|         |       |                                                                                                                                                                                                                      |
|---------|-------|----------------------------------------------------------------------------------------------------------------------------------------------------------------------------------------------------------------------|
| 155-215 | 2Ckb2 | Grayish brown (10YR 5/2) silt, dark grayish brown (10YR 4/2) moist; massive; soft, very friable; few very fine threads of calcium carbonate; few fine and very fine roots; common very fine pores; gradual boundary. |
|---------|-------|----------------------------------------------------------------------------------------------------------------------------------------------------------------------------------------------------------------------|

### **PEORIA LOESS**

#### **Soil 4**

|         |        |                                                                                                                                                                                                                                                                                                           |
|---------|--------|-----------------------------------------------------------------------------------------------------------------------------------------------------------------------------------------------------------------------------------------------------------------------------------------------------------|
| 215-260 | 2Ak1b3 | Brown (10YR 4/3) silt loam, dark brown (10YR 3/3) moist; moderate medium subangular blocky structure parting to moderate medium and fine granular; slightly hard, friable; common fine and very fine threads of calcium carbonate; common fine and many very fine pores; many worm casts; clear boundary. |
|---------|--------|-----------------------------------------------------------------------------------------------------------------------------------------------------------------------------------------------------------------------------------------------------------------------------------------------------------|

|         |        |                                                                                                                                                                                                                                                                                                             |
|---------|--------|-------------------------------------------------------------------------------------------------------------------------------------------------------------------------------------------------------------------------------------------------------------------------------------------------------------|
| 260-320 | 2Ak2b3 | Dark grayish brown (10YR 4/2) silt loam, dark grayish brown (10YR 3/2) moist; weak fine subangular blocky structure parting to moderate medium granular; slightly hard, friable; few fine and very fine threads of calcium carbonate; few fine and many very fine pores; many worm casts; gradual boundary. |
|---------|--------|-------------------------------------------------------------------------------------------------------------------------------------------------------------------------------------------------------------------------------------------------------------------------------------------------------------|

|         |         |                                                                                                                                                                                                                                                                            |
|---------|---------|----------------------------------------------------------------------------------------------------------------------------------------------------------------------------------------------------------------------------------------------------------------------------|
| 320-370 | 2BAtkb3 | Brown (10YR 4/3) silt loam, dark brown (10YR 3/3) moist; moderate medium prismatic structure; hard, friable; few distinct discontinuous very dark brown (10YR 2/2) clay films on ped faces; few fine threads of calcium carbonate; common very fine pores; clear boundary. |
|---------|---------|----------------------------------------------------------------------------------------------------------------------------------------------------------------------------------------------------------------------------------------------------------------------------|

|         |         |                                                                                                                                                                                                                                                                                                                           |
|---------|---------|---------------------------------------------------------------------------------------------------------------------------------------------------------------------------------------------------------------------------------------------------------------------------------------------------------------------------|
| 370-450 | 2Btk1b3 | Brown (10YR 5/3) silt loam, brown (10YR 4/3) moist; moderate medium prismatic structure; hard, friable; common prominent discontinuous very dark grayish brown (10YR 3/2) clay films on ped faces and in macropores; very few fine threads of calcium carbonate; few medium and common very fine pores; gradual boundary. |
|---------|---------|---------------------------------------------------------------------------------------------------------------------------------------------------------------------------------------------------------------------------------------------------------------------------------------------------------------------------|

|         |         |                                                                                                                            |
|---------|---------|----------------------------------------------------------------------------------------------------------------------------|
| 450-530 | 2Btk2b3 | Pale brown (10YR 6/3) silt loam, brown (10YR 5/3) moist; weak medium prismatic structure parting to weak medium subangular |
|---------|---------|----------------------------------------------------------------------------------------------------------------------------|

blocky; slightly hard, friable; common prominent discontinuous very dark grayish brown (10YR 3/2) clay films on ped faces and in macropores; very few fine threads of calcium carbonate; few fine and common very fine pores; clear boundary.

|          |       |                                                                                                                                                          |
|----------|-------|----------------------------------------------------------------------------------------------------------------------------------------------------------|
| 530-600  | 2BCb3 | Pale brown (10YR 6/3) silt loam, brown (10YR 5/3) moist; weak fine subangular blocky structure; soft, friable; common very fine pores; gradual boundary. |
| 600-720+ | 2Cb3  | Pale brown (10YR 6/3) silt loam, brown (10YR 5/3) moist; massive; soft, friable.                                                                         |

---

Table S14. Description of section CC-1

Landform: Co-alluvial fan (AF-2)  
 GPS Location: -99.328882, 40.061606 (NAD 83)  
 Slope: 10%  
 Parent material: Alluvium and colluvium  
 Elevation above river channel: 16.2 m  
 Remarks: Co-alluvial fan is interpreted as grading to the T-2 terrace surface. Soil organic matter from the upper 10 cm of Soil 2 (58 cm) yielded a radiocarbon age of  $880 \pm 30$  yr. B.P. Soil organic matter from the upper 10 cm of Soil 3 (290-300 cm) yielded a radiocarbon age of  $10,060 \pm 40$  yr. B.P. Soil organic matter from the upper 10 cm of the Ak1b3 horizon (330-340 cm) and Ak2b3 horizon (361-371 cm) of Soil 4 yielded radiocarbon ages of  $10,335 \pm 40$  and  $10,790 \pm 45$  yr. B.P., respectively. A piece of conifer charcoal from a burn layer at 610 cm yielded a radiocarbon age of  $20,250 \pm 100$  yr. B.P.

| Depth<br>(cm)                 | Soil<br>Horizon | Description                                                                                                                                                                                                                                                                                                                                                                                      |
|-------------------------------|-----------------|--------------------------------------------------------------------------------------------------------------------------------------------------------------------------------------------------------------------------------------------------------------------------------------------------------------------------------------------------------------------------------------------------|
| <b>ALLUVIUM AND COLLUVIUM</b> |                 |                                                                                                                                                                                                                                                                                                                                                                                                  |
| <b>Soil 3</b>                 |                 |                                                                                                                                                                                                                                                                                                                                                                                                  |
| 290-330                       | Ak1b2           | Brown (10YR 4/3) silt loam, dark brown (10YR 3/3) moist; moderate medium and fine subangular blocky structure parting to moderate medium granular; slightly hard, friable; common (4-5%) fine and very fine threads of calcium carbonate; common fine and few very fine roots; few worm burrows filled with worm casts; common fine and many very fine pores; clear smooth boundary.             |
| <b>Soil 4</b>                 |                 |                                                                                                                                                                                                                                                                                                                                                                                                  |
| 330-361                       | Ak1b3           | Dark grayish brown (10YR 4/2) silt loam, very dark grayish brown (10YR 3/2) moist; moderate medium prismatic structure parting to moderate fine subangular blocky; hard, friable; many (6-8%) fine and medium threads of calcium carbonate; common fine and few very fine roots; few worm casts and open worm and insect burrows; common fine and many very fine pores; gradual smooth boundary. |
| 361-388                       | Ak2b3           | Dark grayish brown (10YR 4/2) silt loam, very dark grayish brown (10YR 3/2) moist; moderate fine subangular blocky structure; hard, friable; parts along bedding planes; few (1-2%) very fine threads of calcium carbonate; common fine and few very fine roots; few worm casts and open worm and insect burrows; common fine and many very fine pores; gradual smooth boundary.                 |



|         |       |                                                                                                                                                                                                                                                                                                                                                                                                                                                                                                                |
|---------|-------|----------------------------------------------------------------------------------------------------------------------------------------------------------------------------------------------------------------------------------------------------------------------------------------------------------------------------------------------------------------------------------------------------------------------------------------------------------------------------------------------------------------|
| 388-410 | ACkb3 | Light olive brown (2.5Y 5/3) silt loam, olive brown (2.5Y 4/3) moist; common prominent fine and few medium yellowish red (7.5YR 6/8 and 7/8) mottles stains concentrated along bedding planes; very weak fine subangular blocky structure; slightly hard, friable; parts along bedding planes; few (1-2%) very fine threads of calcium carbonate; common fine and few very fine roots; few worm casts and open worm and insect burrows; many very fine pores; clear smooth boundary.                           |
| 410-475 | Ckb3  | Laminated pale brown (10YR 6/3) silt loam, brown (10YR 5/3) moist; many prominent fine and medium and few coarse yellowish red (7.5YR 6/8 and 7/8) mottles concentrated along bedding planes; massive; hard, friable; parts along bedding planes; few (1-2%) very fine threads of calcium carbonate; common very fine soft to slightly hard manganese oxide concentrations; common fine and few very fine roots; few worm casts and open worm and insect burrows; many very fine pores; clear smooth boundary. |
|         |       | <b>PEORIA LOESS</b>                                                                                                                                                                                                                                                                                                                                                                                                                                                                                            |
| 475-615 | 2Ckb3 | Light gray (2.5Y 7/2) silt loam, light brownish gray (2.5Y 6/2) moist; common prominent fine, medium and coarse yellowish red (7.5YR 6/8 and 7/8) mottles; massive; hard, friable; common hard yellowish red (7.5YR 6/8 and 7/8) iron oxide concretions that are 1-4 cm in diameter; common calcium carbonate concretions that are 1-4 cm in diameter; common iron oxide and calcium carbonate rhizoliths; many very fine pores.                                                                               |

---
